# Supplementary material for: Co-ligand tuned pyrimidine-2-carboxylate Mn(ii) complexes from a 2D 63 layer to an interpenetrated srs-net
Source: Royal Society of Chemistry journal article supplement (doi:10.1039/c7dt01045a), 2017-01-01
Supplement: c7dt01045a1.pdf [file c7dt01045a1.pdf]

## *Supporting Information*

### **Co-Ligand Tuned Pyrimidine-2-carboxylate Mn(II) Complexes from 2D 6<sup>3</sup>Layer to Interpenetrated Srs-net**

Rui Sun,<sup>a</sup> Su-Mei Gao,<sup>b</sup> Shao-Qiang Wang,<sup>a</sup> Wei-Chao Song,<sup>c</sup> Jiong-Peng Zhao,<sup>\*a</sup> Fu-Chen Liu,<sup>\*a</sup>

<sup>a</sup> School of Chemistry and Chemical Engineering, Tianjin University of Technology, Tianjin 300384, China. [horryzhao@yahoo.com](mailto:horryzhao@yahoo.com) and [fuchenliutj@yahoo.com](mailto:fuchenliutj@yahoo.com)

<sup>b</sup> School of Electronic and Information Engineering, Tianjin Vocational Institute, Tianjin 300410, P. R. China

<sup>c</sup> TKL of Structure and Performance for Functional Molecules, College of Chemistry, Tianjin Normal University, Tianjin 300387, P. R. China

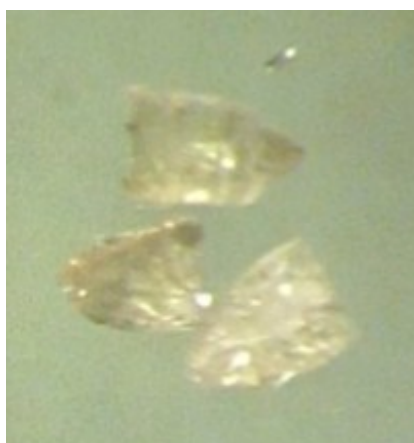

**Figure S1.** Photograph of the compound **2** crystal

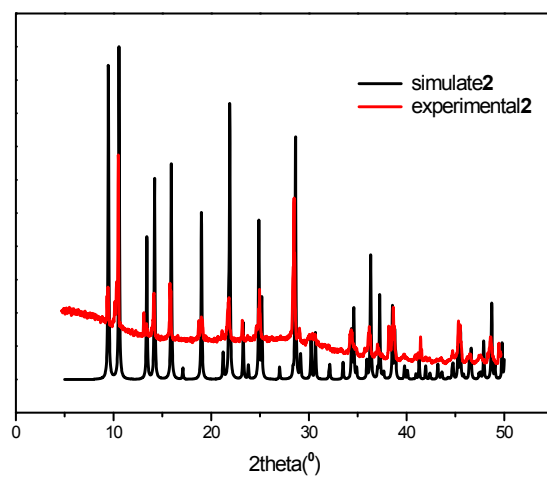

**Figure S2.** PXRD patterns of simulated from the single-crystal data of compound **2** (black) and as-synthesized compound **2** (red).

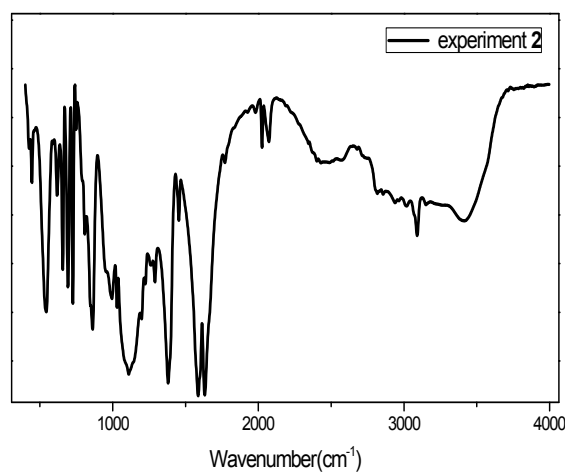

**Figure S3.** The IR diagrams of compound **2**

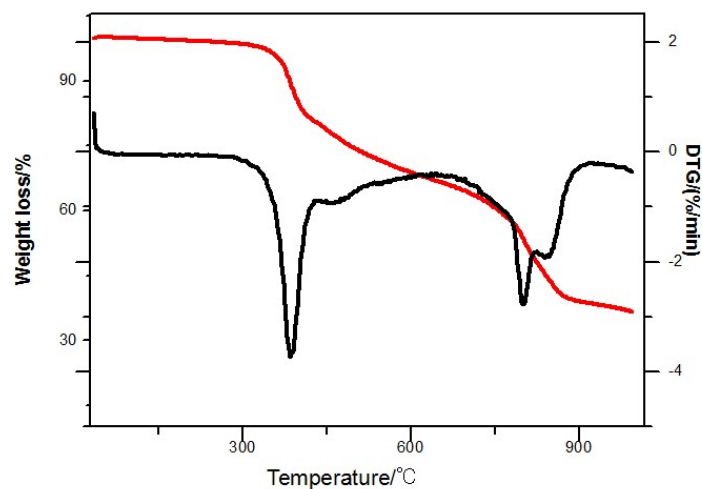

**Figure S4.** Thermal analyses of compound **2**. TG curve, red ; DTG curve, black.

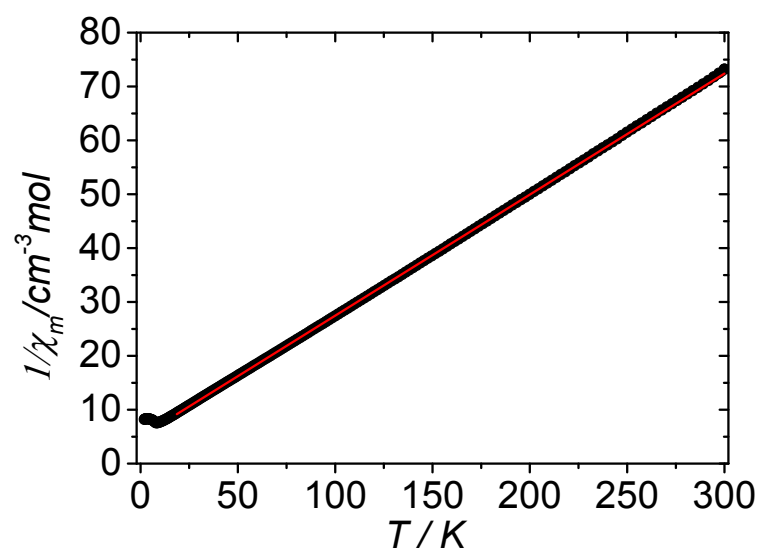

**Figure S5.** Curie plot for complex **2**. The red solid line is the best fit to the Curie-Weiss law.

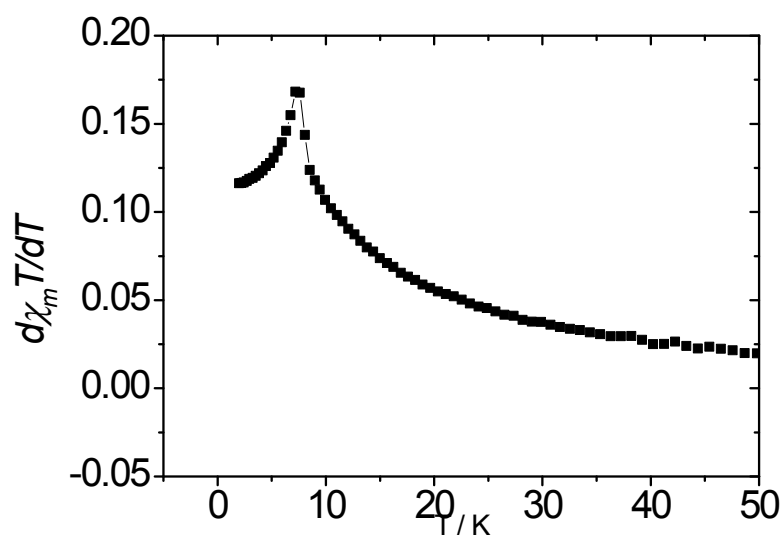

**Figure S6.** The  $d\chi_m T/dT$  plots of **2** in 2-50 K.
